# Supplementary material for: Synthesis of three-dimensional porous hyper-crosslinked polymers via thiol–yne reaction
Source: publisher site journal article supplement (doi:10.3762/bjoc.12.252), 2016-11-29
Supplement: Additional file 1 [file 1860-5397-12-252-S1.pdf]

**Supporting Information**  
**for**  
**Synthesis of three-dimensional porous hyper-crosslinked**  
**polymers via thiol-yne reaction**

Mathias Lang<sup>1</sup>, Alexandra Schade<sup>1</sup> and Stefan Bräse<sup>\*1,2</sup>

Address: <sup>1</sup>Institute of Organic Chemistry, Karlsruhe Institute of Technology – Campus South, Fritz-Haber-Weg 6, 76131 Karlsruhe, Germany and <sup>2</sup>Institute of Toxicology and Genetics, Karlsruhe Institute of Technology – Campus North, Hermann-von-Helmholtz-Platz 1, 76344 Eggenstein-Leopoldshafen, Germany

Email: Stefan Bräse - bräse@kit.edu

\* Corresponding author

**Experimental procedures and additional measurements**

**Contents**

|                               |     |
|-------------------------------|-----|
| General Remarks .....         | S2  |
| Synthetic procedures .....    | S3  |
| Adsorption measurements ..... | S5  |
| PXRD patterns.....            | S6  |
| TGA measurements.....         | S7  |
| Pore size distributions ..... | S9  |
| References .....              | S10 |

## General remarks

IR spectra were recorded on a Bruker Alpha spectrometer using the attenuated total reflection technique (ATR). The absorption band is given in wave numbers  $\tilde{\nu}$  in  $\text{cm}^{-1}$ . The intensities of the bands were characterized as follows: vs = very strong 0–10% T, s = strong 11–40% T, m = medium 41–70% T, w = weak 71–90% T, vw = very weak, 91–100% T. Dinitrogen ( $\text{N}_2$ ) adsorption experiments were carried out on a Thermo Scientific™ Surfer at 77 K. Specific surface areas (BET and Langmuir) were calculated at a relative pressure range of  $p/p_0 = 0.05$ – $0.3$ . Cumulative volumes were calculated at a relative pressure of  $p/p_0 = 0.99$ . Elemental analyses were performed on an Elementar vario MICRO device using a Sartorius M2P precision balance. The following abbreviations were used: calcd. = calculated data, found = measured data. Thermogravimetric analyses (TGA) were performed under  $\text{N}_2$  on a Shimadzu TGA-50 thermogravimetric analyser with a heat rate of  $10\text{ }^\circ\text{C min}^{-1}$ . Powder X-ray diffraction (PXRD) patterns were measured at room temperature using a STORE STADI-P diffractometer with  $\text{CuK}\alpha$  radiation. Scanning electron microscopy was carried out on a Zeiss Supra 55 and a Zeiss Merlin. Solvents, reagents and chemicals were purchased from Sigma–Aldrich, ABCR and Fisher Scientific. All solvents, reagents and chemicals were used as purchased unless stated otherwise. Tetrakis(4-ethynylphenyl)methane [1], tetrakis(4-mercaptophenyl)methane [2] and 1,4-bis(tris(4'-ethynyl-phenyl)methyl)benzene [3] were synthesized according to literature procedures.

## Synthetic procedures

### Synthesis of hyper-crosslinked polymers (HCPs) via thiol–yne reaction:

#### HCP 3:

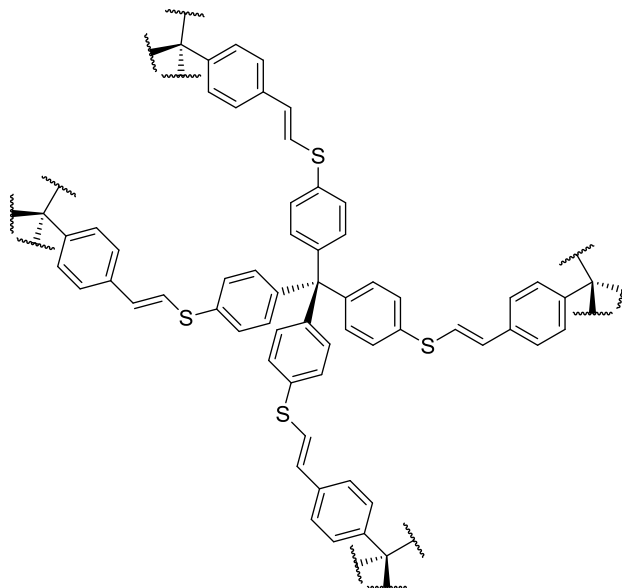

In a sealed reaction vessel, 70.0 mg of tetrakis(4-ethynylphenyl)methane (168  $\mu\text{mol}$ , 1.00 equiv), 75.4 mg of tetrakis(4-mercaptophenyl)methane (168  $\mu\text{mol}$ , 1.00 equiv) and 1.10 mg of AIBN (6.72  $\mu\text{mol}$ , 4.00 mol %) were dissolved in 4 mL toluene and stirred for 15 h at 80  $^{\circ}\text{C}$ . The evolved solid was filtered and washed with toluene (50 mL), ethyl acetate (50 mL), methanol (50 mL), dichloromethane (50 mL) and acetone (50 mL). Finally, the product was dried at 80  $^{\circ}\text{C}$  in vacuo for 16 h to yield 135 mg (90%) of HCP **3** as a yellowish powder. – IR (ATR)  $\tilde{\nu}$  ( $\text{cm}^{-1}$ ) = 3023 (vw), 1590 (vw), 1485 (w), 1401 (vw), 1192 (vw), 1091 (vw), 1014 (w), 937 (w), 811 (w), 740 (vw), 625 (vw), 551 (vw). –  $\text{C}_{58}\text{H}_{40}\text{S}_4$  (864.2): calc. C 80.52, H 4.66, S 14.84, found C 79.06, H 4.71, S 14.55.

## HCP 5:

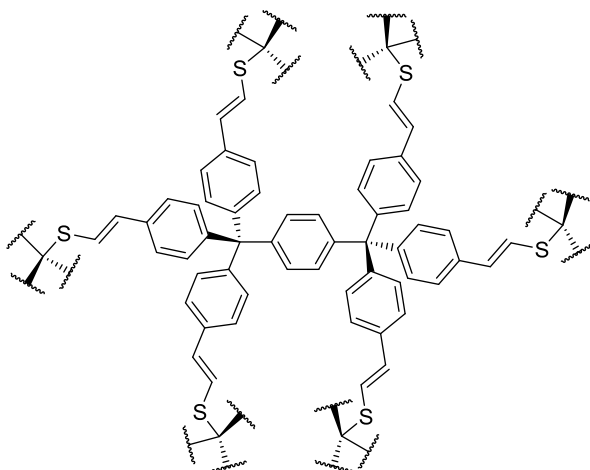

In a sealed reaction vessel, 72.0 mg of 1,4-bis(tris(4'-ethynylphenyl)methyl)benzene (102  $\mu\text{mol}$ , 1.00 equiv), 68.6 mg of tetrakis(4-mercaptophenyl)methane (153  $\mu\text{mol}$ , 1.50 equiv) and 0.70 mg of AIBN (4.07  $\mu\text{mol}$ , 4.00 mol %) were dissolved in 4 mL toluene and stirred for 15 h at 80 °C. The evolved solid was filtered and washed with toluene (50 mL), ethyl acetate (50 mL), methanol (50 mL), dichloromethane (50 mL) and acetone (50 mL). Finally the product was dried at 80 °C in vacuo for 16 h to yield 134 mg (95%) of HCP **5** as an orange powder. – IR (ATR)  $\tilde{\nu}$  ( $\text{cm}^{-1}$ ) = 3016 (vw), 1589 (vw), 1484 (vw), 1399 (vw), 1191 (vw), 1089 (vw), 1014 (vw), 936 (vw), 808 (w), 729 (vw), 545 (vw). –  $\text{C}_{374}\text{H}_{256}\text{S}_{24}$  (5513.3): calc. C 81.38, H 4.68, S 13.94, found C 79.34, H 4.49, S 13.20.

## Adsorption measurements

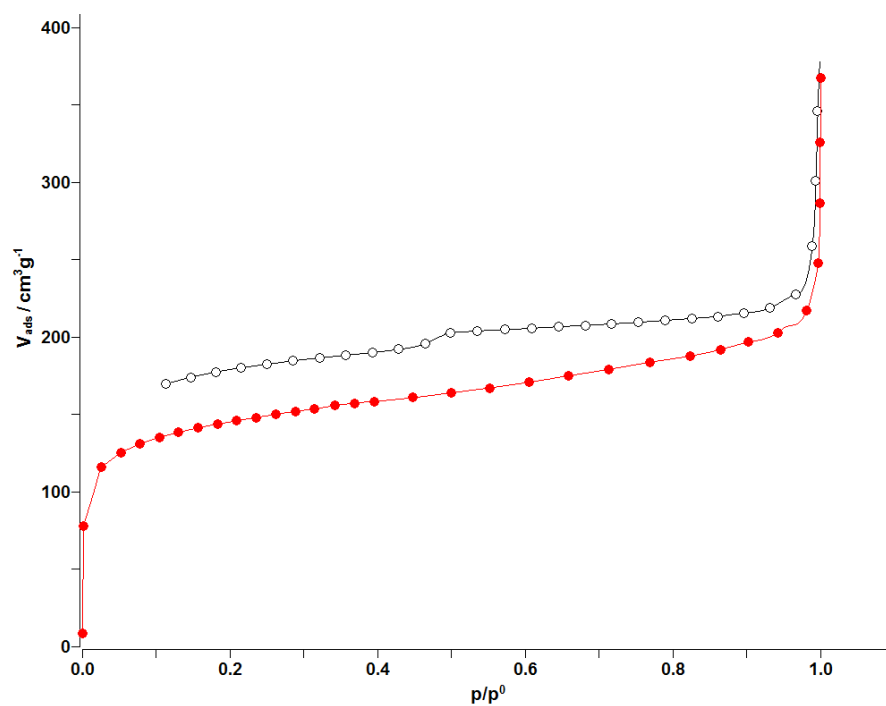

**Figure S1:** The  $\text{N}_2$  isotherms of HCP 3 (red: adsorption, black: desorption) at 77 K (specific surface area (BET) of  $470 \text{ m}^2/\text{g}$ ).

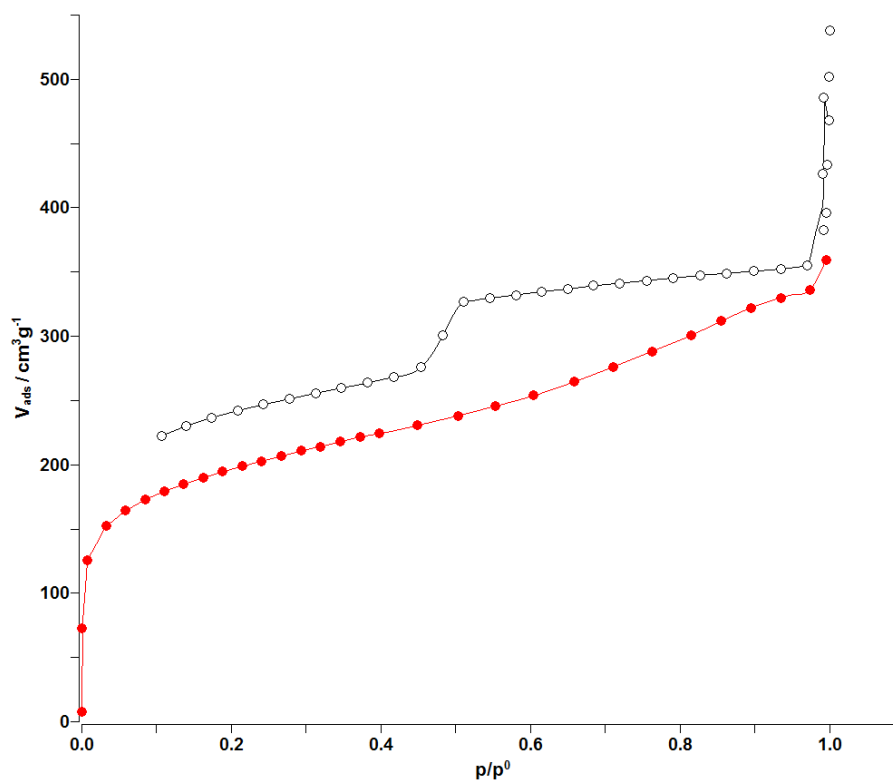

**Figure S2:** The  $\text{N}_2$  isotherms of HCP 5 (red: adsorption, black: desorption) at 77 K (specific surface area (BET) of  $650 \text{ m}^2/\text{g}$ ).

## PXRD patterns

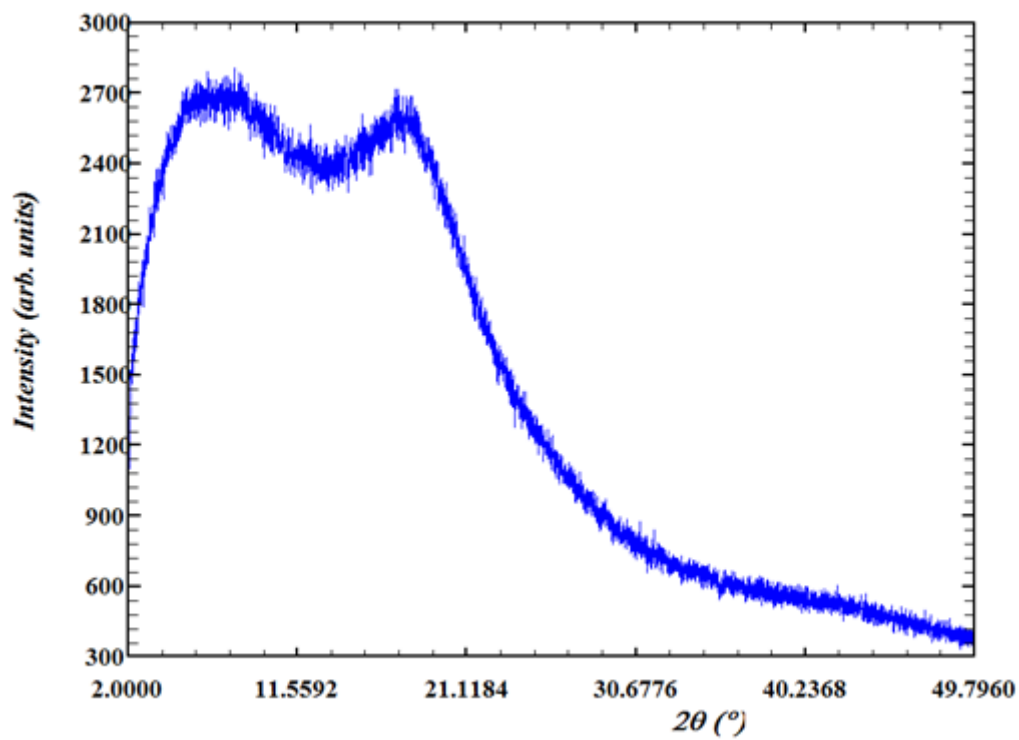

Figure S3: PXRD of HCP 3.

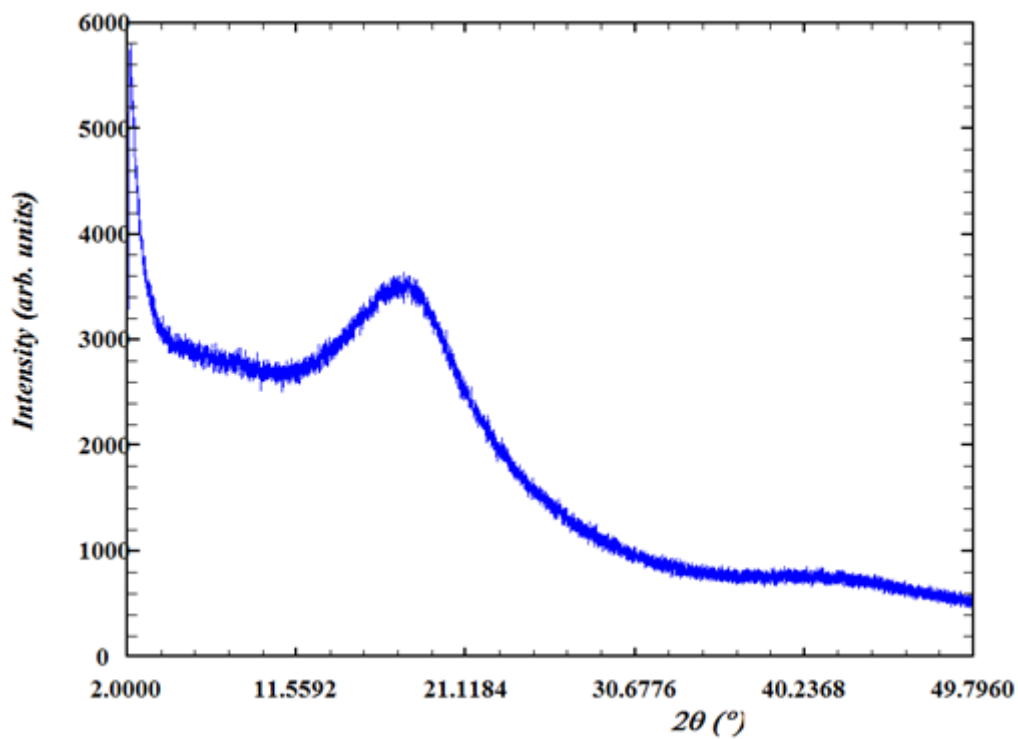

Figure S4: PXRD of HCP 5.

# TGA measurements

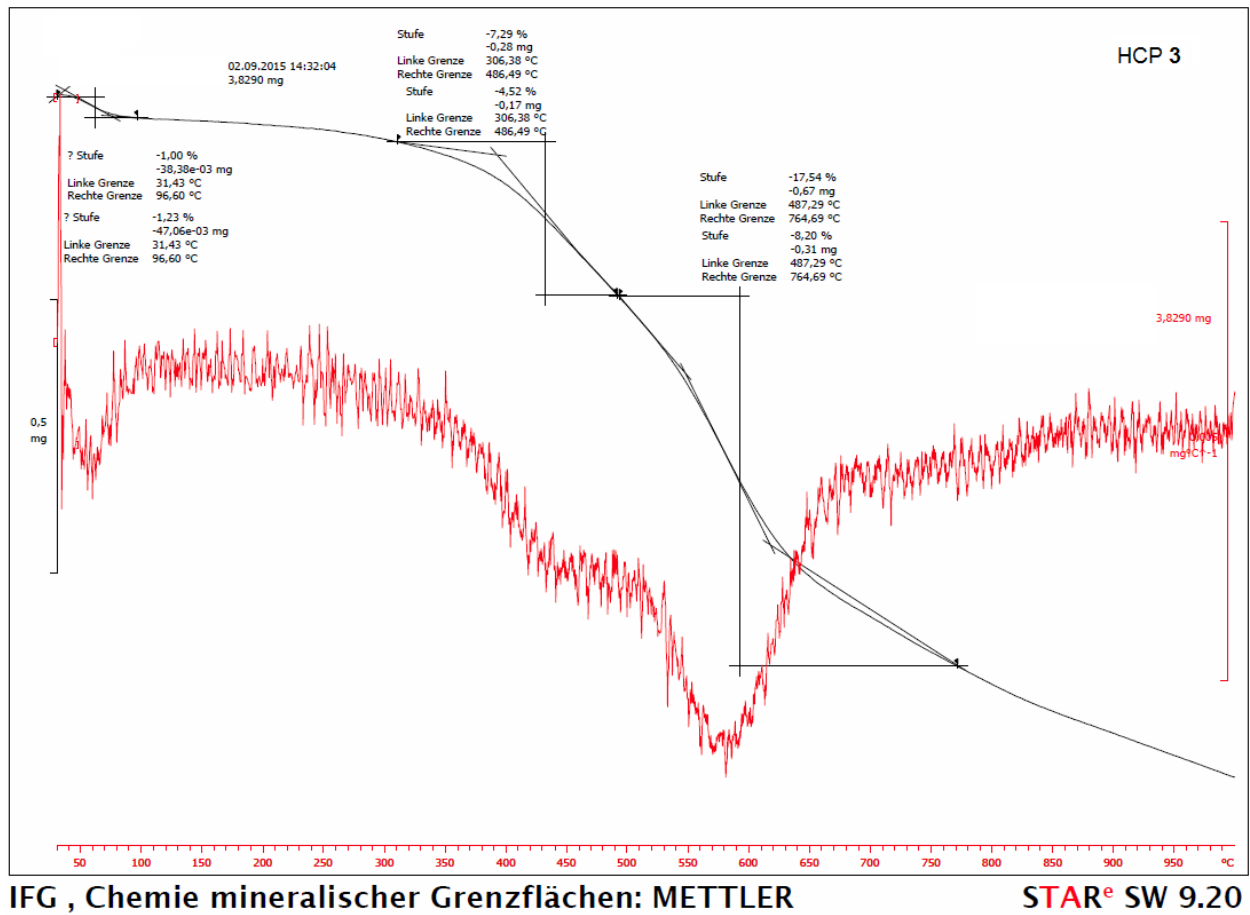

Figure S5: TGA curve of HCP 3.

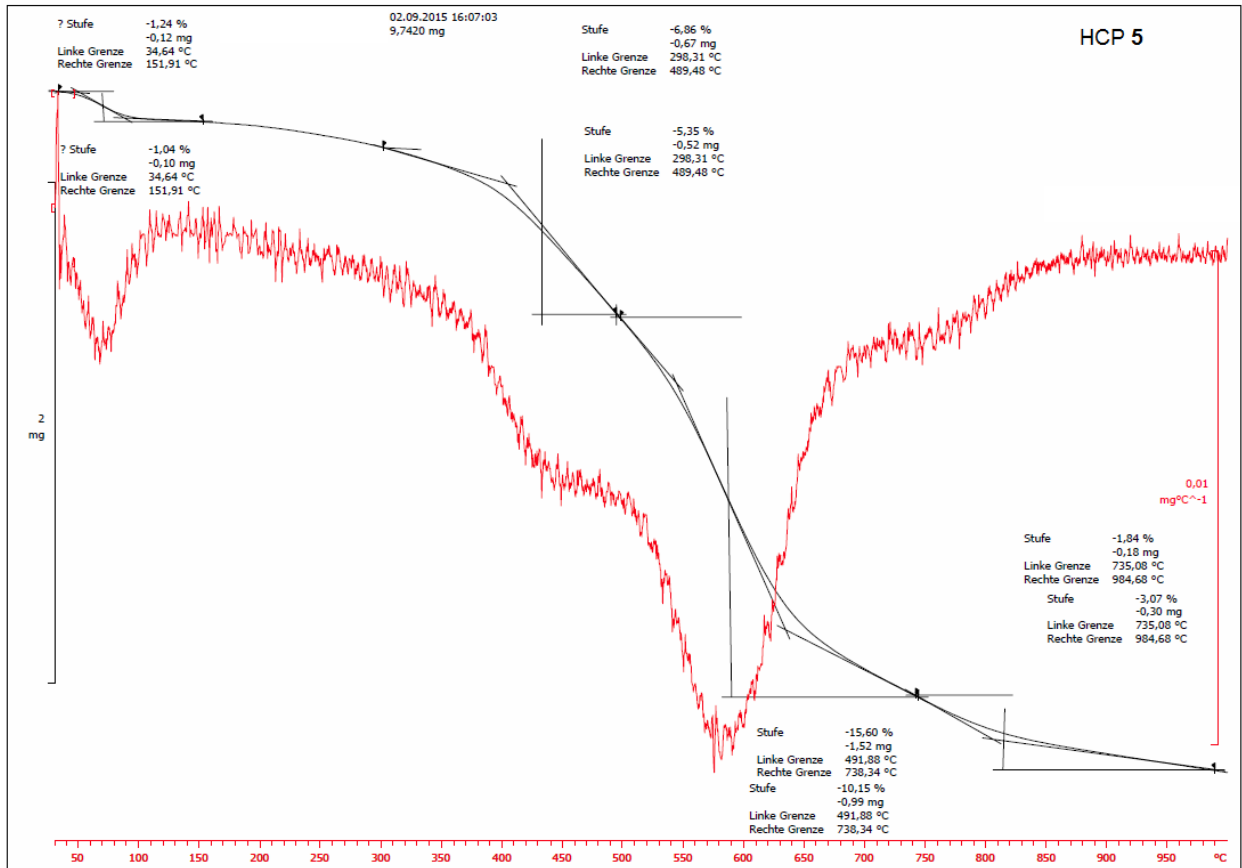

IFG , Chemie mineralischer Grenzflächen: METTLER

STAR<sup>e</sup> SW 9.20

Figure S6: TGA curve of HCP 5.



## Pore size distributions

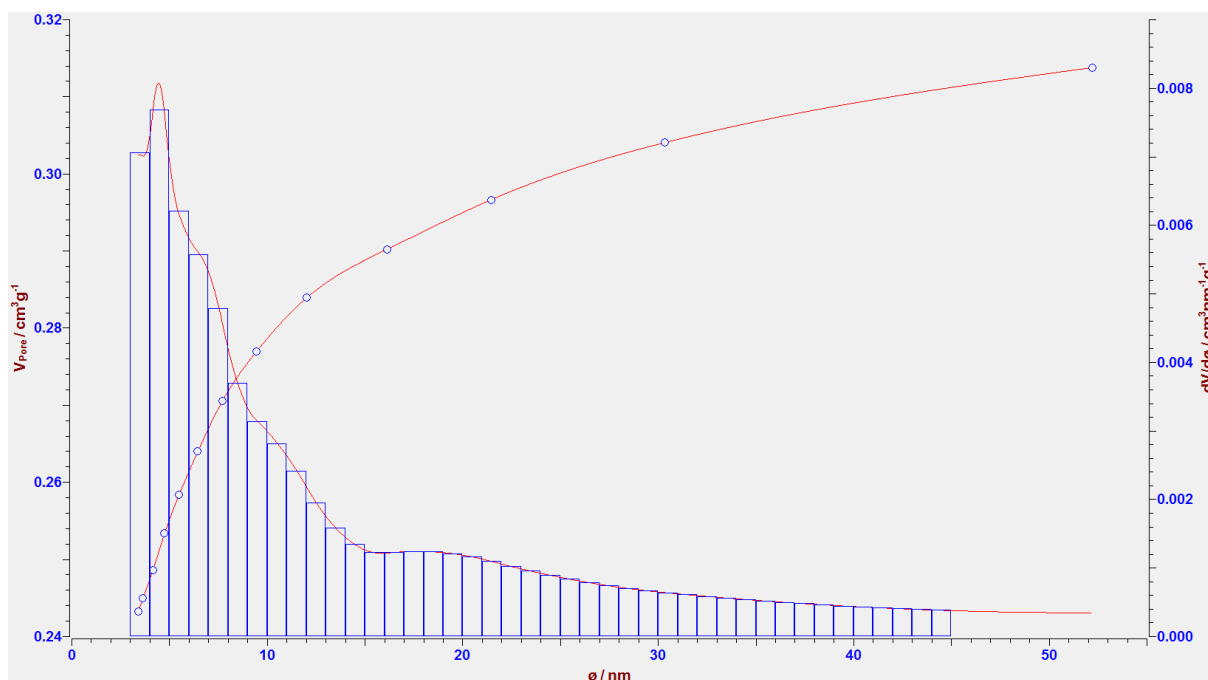

**Figure S7:** Pore size distribution of HCP **3** using the Horvath and Kawazoe model in the pressure range of  $p/p_0 = 0.35\text{--}0.95$ .

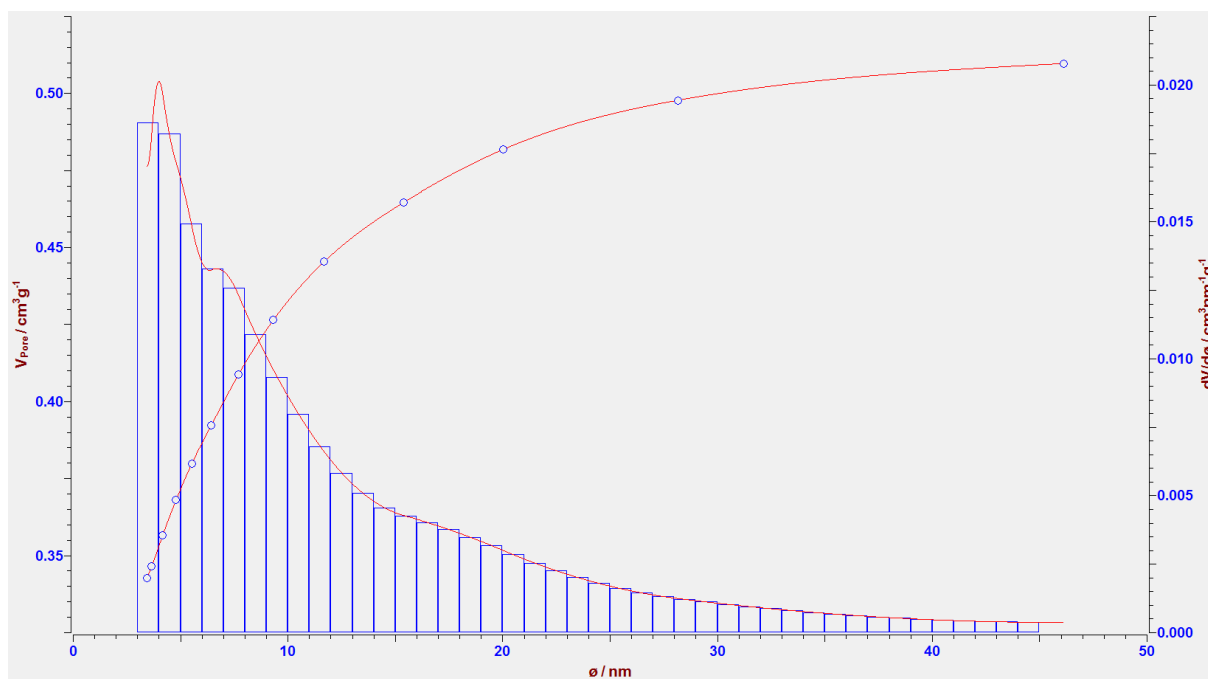

**Figure S8:** Pore size distribution of HCP **5** using the Horvath and Kawazoe model in the pressure range of  $p/p_0 = 0.35\text{--}0.95$ .

## References

1. Pandey, P.; Farha, O. K.; Spokoyny, A. M.; Mirkin, C. A.; Kanatzidis, M. G.; Hupp, J. T.; Nguyen, S. T. *J. Mater. Chem.* **2011**, *21*, 1700–1703.
2. Monnereau, L.; Nieger, M.; Muller, T.; Bräse, S. *Adv. Funct. Mater.* **2014**, *24*, 1054–1058.
3. Plietzsch, O.; Schade, A.; Hafner, A.; Huuskonen, J.; Rissanen, K.; Nieger, M.; Muller, T.; Bräse, S. *Eur. J. Org. Chem.* **2013**, 283–299.
